1 **A Panel of Diverse *Klebsiella pneumoniae* Clinical Isolates for Research and Development**

2

3 Melissa J. Martin<sup>a</sup>, William Stribling<sup>a</sup>, Ana C. Ong<sup>a</sup>, Rosslyn Maybank<sup>a</sup>, Yoon I. Kwak<sup>a</sup>, Joshua  
4 A. Rosado-Mendez<sup>a</sup>, Lan N Preston<sup>a</sup>, Katharine F. Lane<sup>a</sup>, Michael Julius<sup>a</sup>, Anthony R. Jones<sup>b</sup>,  
5 Mary Hinkle<sup>c</sup>, Paige E. Waterman<sup>d</sup>, Emil P. Lesho<sup>c</sup>, Francois Lebreton<sup>a</sup>, Jason W. Bennett<sup>a</sup>, and  
6 Patrick T. McGann<sup>a</sup>

7

8 <sup>a</sup>Multidrug-Resistant Organism Repository and Surveillance Network, Walter Reed Army  
9 Institute of Research, Silver Spring Maryland, USA

10 <sup>b</sup>Department of Virology, Armed Forces Research Institute of Medical Sciences, Bangkok,  
11 Thailand

12 <sup>c</sup>Infectious Diseases Unit, Rochester General Hospital, Rochester New York, USA

13 <sup>d</sup> Department of Medicine, Uniformed Services University of the Health Sciences, Bethesda,  
14 Maryland, USA

15 Keywords: *Klebsiella pneumoniae*, antimicrobial resistance, whole-genome sequencing,  
16 convergent

17 Short title: Diverse *K. pneumoniae* strain set

18

19 #Address correspondence to Patrick T. McGann, [patrick.t.mcgann4.civ@mail.mil](mailto:patrick.t.mcgann4.civ@mail.mil)

20 Walter Reed Army Institute of Research

21 503 Robert Grant Avenue, 2A36

22 Silver Spring, MD 20910, USA

23

24

25 **Importance**

26 *Klebsiella pneumoniae* is a major cause of healthcare-associated infections that are increasingly  
27 difficult to treat due to the emergence of multi-drug resistant strains. In particular, strains  
28 expressing extended-spectrum  $\beta$ -lactamases and carbapenemases have attained global notoriety,  
29 with the World Health Organization listing these strains as a “critical-priority” for the  
30 development of new therapeutics. Access to a diverse collection of strains for testing is critical  
31 for this endeavor, but few resources currently exist. Similarly, pivotal research of the genetic  
32 determinants underlying the pathogenesis of hypervirulent lineages is hampered by the lack of  
33 standardized, comparator strains. Herein we describe a panel of 100 diverse *K. pneumoniae*  
34 constructed to maximize genetic and phenotypic diversity from a repository of over 3,800  
35 clinical isolates collected over 19 years. The panel, and all associated metadata and genome  
36 sequences, is provided at no cost and will greatly assist efforts by academic, government, and  
37 industry research groups.

## 38 **Abstract**

39 *Klebsiella pneumoniae* are a leading cause of healthcare associated infections worldwide. In  
40 particular, strains expressing extended-spectrum  $\beta$ -lactamases (ESBLs) and carbapenemases pose  
41 serious treatment challenges, leading the World Health Organization (WHO) to designate ESBL  
42 and carbapenem-resistant Enterobacteriaceae (CRE) as “critical” threats to human health.  
43 Research efforts to combat these pathogens can be supported by accessibility to diverse and  
44 clinically relevant isolates for testing novel therapeutics. Here, we describe a panel of 100  
45 diverse *K. pneumoniae* isolates publicly available to assist the research community in this  
46 endeavor.

47 Whole-genome sequencing (WGS) was performed on 3,878 *K. pneumoniae* clinical isolates  
48 housed at the Multidrug-Resistant Organism Repository and Surveillance Network. The isolates  
49 were cultured from 63 facilities in 19 countries between 2001 and 2020. Core-genome multilocus  
50 sequence typing and high-resolution single nucleotide polymorphism based phylogenetic  
51 analyses captured the genetic diversity of the collection and were used to select the final panel of  
52 100 isolates. In addition to known multi-drug resistant (MDR) pandemic lineages, the final panel  
53 includes hypervirulent lineages and isolates with specific and diverse resistance genes and  
54 virulence biomarkers. A broad range of antibiotic susceptibilities ranging from pan-sensitive to  
55 extensively drug resistant isolates are described. The panel collection, all associated metadata  
56 and genome sequences, are available at no additional cost and will be an important for the  
57 research community and for the design and development of novel antimicrobial agents and  
58 diagnostics against this important pathogen.

## 59 Introduction

60 *Klebsiella pneumoniae* are a leading cause of nosocomial infections resulting in pneumonia,  
61 bacteremia, surgical site, and urinary tract infections (1). A member of the problematic ESKAPE  
62 (*Enterococcus faecium*, *Staphylococcus aureus*, *Klebsiella pneumoniae*, *Acinetobacter*  
63 *baumannii*, *Pseudomonas aeruginosa*, *Enterobacter*) group of pathogens (2), “classical” *K.*  
64 *pneumoniae* (cKp) are associated with prolonged outbreaks, increased disease burden, and high  
65 mortality rates (3, 4). The prevalence of cKp infections has steadily increased since 2005,  
66 primarily driven by strains acquiring extended-spectrum  $\beta$ -lactamases (ESBLs) and  
67 carbapenemases conferring resistance to 3<sup>rd</sup> generation cephalosporins and carbapenem  
68 antibiotics (5, 6). These multidrug resistant (MDR)-cKp clones are a threat to the medical  
69 community as antibiotic treatment options are limited and non-susceptibility to all antibiotics has  
70 been reported (7). In alignment, the World Health Organization (WHO) ranks *K. pneumoniae*  
71 among the critical priority list for the development of therapeutics (8).

72 In parallel to hospital-acquired MDR-cKp, severe community-acquired infections caused by so  
73 called “hypervirulent” *K. pneumoniae* (hvKp) lineages have also emerged (9). These invasive  
74 strains are generally susceptible to antibiotics and generally occur in healthy hosts causing  
75 meningitis, liver abscesses, endophthalmitis, and soft tissue infections (9). hvKp strains are  
76 associated with the acquisition of large virulence plasmids and/or mobile elements encoding  
77 virulence determinants such as siderophores [e.g aerobactin (*iuc*), salmochelin (*iro*),  
78 yersiniabactin (*ybt*)], metabolite transporter *peg-344*, genotoxic polyketide colibactin (*clb*), and  
79 regulators of mucoviscosity and capsular polysaccharide (*rmpA* and *rmpA2*) (10, 11). While  
80 there are distinct clinical and genetic differences between the two main pathotypes of *K.*  
81 *pneumoniae*, there has been a concerning emergence of convergent lineages that carry both MDR

82 and virulence determinants (12–14). This confluence of MDR-cKp and hvKp has provided  
83 additional impetus to develop novel antibiotics and therapeutics (15).

84 The *K. pneumoniae* population is diverse consisting of over 250 clonal phylogenetic lineages and  
85 an estimated accessory genome of >100,000 protein coding sequences (6, 16). Despite hundreds  
86 of clones that can cause infections, a few “high-risk”, globally disseminated, MDR-cKp lineages  
87 (e.g. ST-11, ST-14, ST-101, ST-147, ST-258, ST-307) contribute to the majority of infections  
88 (6). For example, the dissemination of KPC-type carbapenemases is largely attributed to the  
89 well-studied, clonal ST-258 lineage, which is now endemic in many countries, including the  
90 United States (17–19). More recently, carbapenem resistant ST-307 and ST-147 clonal lineages  
91 carrying various carbapenemases (NDMs, OXA-48-like, and KPC) have emerged and are  
92 circulating in countries such as the United States (19), Germany (20), and in Italy (21). In  
93 contrast, unrelated hvKp lineages are mainly described from the Asian Pacific Rim countries and  
94 are predominately ST-23, ST-86, ST-65, ST-380, and ST-66 lineages (6, 9). These hvKp strains  
95 are associated with very few capsular polysaccharide types K1, K2, and/or K5, in contrast to the  
96 substantial diversity of K-loci found in cKp strains (22). The significant genomic diversity and  
97 constantly changing epidemiology highlights the importance of using the *K. pneumoniae*  
98 population structure for identifying diverse isolates when developing effective targets for  
99 treatments and diagnostics against problematic MDR-cKP, hvKp, and emerging clones.

100 In this report, we utilized the large repository of 3,878 clinical *K. pneumoniae* maintained by the  
101 Multidrug-Resistant Organism Repository and Surveillance network (MRSN) (23) and collected  
102 globally between 2001 and 2020. Comparable to our previous work (24, 25) we constructed a  
103 reference panel of 100 *K. pneumoniae* clinical isolates that captures the extensive genetic  
104 diversity of this species, as well as variable antibiotic resistance gene content and virulence gene

105 content along with a wide range of antimicrobial susceptibility profiles. This panel is available to  
106 the research community at no extra cost to aid in the design and development of novel  
107 therapeutics and diagnostics for this critical pathogen.

108

## 109 **Results**

### 110 **Global *K. pneumoniae* population structure and collection diversity**

111 3,878 *K. pneumoniae* clinical isolates were collected over a 19-year period (2001 to 2020) from  
112 across the U.S. and globally in collaboration with the U.S. Department of Defense's Global  
113 Emerging Infections Surveillance (GEIS) branch. After removal of serial isolates from the same  
114 patients, 3,123 primary isolates from 2,760 patients were analyzed by core-genome multilocus  
115 sequence typing (cgMLST) to generate a minimum spanning tree revealing the genomic diversity  
116 of the population (**Fig. 1A**). The isolates were recovered from 63 healthcare facilities across 6  
117 continents including North America (63%), Asia (17.6%), Europe (8.9%), South America  
118 (5.0%), Africa (4.7%), and Oceania (0.4%). The majority were cultured from urine (46%),  
119 followed by respiratory (11%), perianal surveillance swabs (10%), wound (9%), blood (9%), and  
120 body fluid (2%) cultures. *In silico* MLST using the scheme designed by Diancourt *et al.* (26)  
121 identified 480 ST's with 260 (54%) found in isolate(s) from a single patient. Despite the large  
122 number of ST's, 34% of the isolate collection is represented by 6 globally problematic clones:  
123 ST-15 (7.8%), ST-147 (5.9%), ST-258 (5.8%), ST-307 (5.3%), ST-14 (4.8%), and ST-16 (4.6%)  
124 (6). Clonal lineages were associated with lower allelic diversity (e.g. ST-258 maximum of 87  
125 allelic differences) however, extensive diversity was observed within other lineages (e.g. 1,312  
126 allelic differences within ST-37) (**Fig. 1A**).

### 127 **Selection of a nonredundant, genetically diverse panel of *K. pneumoniae***

128 Based on the cgMLST analysis, an initial subset of 346 isolates (11%) was selected to represent  
129 the maximum genetic diversity of the collection and to minimize clonal redundancy (**Fig. 1A**,  
130 **red dots**). This subset, encompassing 143 STs, was further compared using a maximum  
131 likelihood single nucleotide polymorphism (SNP)-based phylogenetic tree (**Fig. 1B**). In an effort

132 to provide a pragmatic panel, 100 isolates were selected from the subset and analyzed by core  
133 genome SNP-based phylogeny (**Fig. 2 and Table S1**). This final panel of 100 isolates  
134 encompassed 94 STs, including 6 novel ST's, and retained substantial diversity in gene content.  
135 The core genome encompassed 3,034 genes with the pangenome consisting of 21,419 genes  
136 (**Fig. S1**). Similar to previous studies (27, 28), the most prevalent predicted O antigen types,  
137 involved in the composition of cell surface lipopolysaccharide, were O1, O2, and O3, which  
138 were found in 81% of the panel isolates, followed by types O4 (10%), O5 (5%), and unknown  
139 (4%) (**Table S1**). The panel also contains 54 distinct capsular polysaccharide types, with K2 type  
140 being the most prevalent ( $n = 7$ ).

#### 141 **Distinct virulence gene content in the *K. pneumoniae* panel isolates**

142 Acquired *K. pneumoniae* virulence loci associated with the hvKp pathotype were characterized  
143 in the panel isolates. Thirty isolates in the final panel carried the *ybt* siderophore gene cluster  
144 found on chromosomally inserted integrative conjugative elements (ICEKp). The ICEKp3  
145 lineage (encoding *ybt9* sequence type) was the most prevalent and found in 8 isolates from ST-  
146 11, ST-15, ST-16, ST-101, ST-147, ST-307, ST-340, and ST-1271 (**Table S1**). Seven isolates  
147 carried *clb*, encoding the genotoxic colibactin, in conjunction with *ybt* (lineage 1, 12, and/or 17)  
148 that were associated with the ICEKp10 lineage, as previously described (29). The *iro* gene  
149 cluster encoding salmochelin synthesis and the regulators for hypermucoidity and capsule  
150 expression, *rmpA* and/or *rmpA2*, were identified in 3 isolates. Notably, 8 isolates harbored the  
151 aerobactin-encoding *iuc* genes, including 2 known hvKp lineages (ST-380 and ST-86) with the  
152 predicted serum resistant K2 capsular serotype (22). Further, 6 isolates carried the *iuc* loci in  
153 addition to ESBL genes (*bla*<sub>CTX-M-14</sub> or *bla*<sub>CTX-M-15</sub>) (**Fig. 1C**). Alarming, 2 of these genotypic



154 convergent isolates also carried the *bla*<sub>NDM-1</sub> carbapenemase including the recently characterized  
155 epidemic ST-147 isolate, MRSN 752729, from a nosocomial outbreak in Italy (12).

### 156 **AMR gene content and antimicrobial susceptibilities of the final panel**

157 64 distinct antibiotic susceptibility profiles were observed in the final 100 isolate panel (**Fig. 2**  
158 **and Table S1**). Using the susceptibility criteria developed by Magiorakos *et al.* (30), 1 isolate  
159 was pan drug resistant (PDR), 28 were extensively drug resistant (XDR), 46 isolates were MDR,  
160 7 were non-MDR, and 19 were pan-susceptible to all antibiotics tested. Notably, 56 isolates were  
161 non-susceptible to the 3<sup>rd</sup> generation cephalosporins tested (ceftazidime and ceftriaxone), 24  
162 were non-susceptible to carbapenems (imipenem and meropenem), and 10 were non-susceptible  
163 to the newer  $\beta$ -lactam/ $\beta$ -lactamase inhibitor, ceftazidime-avibactam.

164 Overall, AMR genes known to confer non-susceptibility were detected in all 100 genomes with  
165 135 distinct alleles identified from 40 antibiotic families (**Table S1**). The majority of intrinsic  
166 *bla*<sub>SHV</sub> class-A  $\beta$ -lactamase alleles detected were *bla*<sub>SHV-1</sub> and/or *bla*<sub>SHV-11</sub> (16). In 59 isolates,  
167 *bla*<sub>SHV</sub> and/or *bla*<sub>CTX-M</sub> ESBLs were detected, with *bla*<sub>CTX-M-15</sub> ( $n = 44$ ) being the most prevalent.  
168 Three isolates (MRSN 750999, 680172, 27106) carried *bla*<sub>SHV-27</sub> as their sole ESBL gene (31),  
169 but were susceptible to the 3<sup>rd</sup> generation cephalosporins. The *bla*<sub>GES-5</sub> ESBL was found in a  
170 single isolate, MRSN 28183, resulting in non-susceptibility to 3<sup>rd</sup> generation cephalosporins and  
171 ceftolozane-tazobactam.

172 Carbapenemase genes encoding IMP, KPC, NDM, OXA-48-like, and VIM enzymes were  
173 present in 24 isolates. Eleven isolates produced OXA-48-like  $\beta$ -lactamases (OXA-48, -181, -232)  
174 capable of hydrolyzing carbapenem antibiotics, with OXA-48 being the most common ( $n = 7$ ).

175 All OXA-48-like positive isolates co-produced the ESBL CTX-M-15 (except a single isolate,  
176 MRSN 13748, with CTX-M-14) and as expected were non-susceptible to ceftazidime, cefepime,

177 aztreonam, imipenem, and meropenem. Three OXA-48-like carrying isolates also co-produced  
178 NDM-1 or -5 enzymes including lineages ST-147, ST-16, and the well-studied hvKp lineage ST-  
179 23 (**Table S1**). As expected, all 10 isolates carrying genes encoding the Ambler class B Metallo-  
180  $\beta$ -lactamases (MBL; IMP, NDM and VIM variants) were non-susceptible to ceftazidime-  
181 avibactam. As carbapenemase non-susceptibility can also be mediated through mutations in the  
182 outer membrane proteins (OmpK35 and/or OmpK36) in conjunction with the expression of an  
183 ESBL and/or acquired AmpC  $\beta$ -lactamases (32, 33), all strains were examined for known  
184 mutations in these genes. Variations in OmpK35 and/or OmpK36 were observed in 15 isolates,  
185 of which 12 carried a carbapenemase and were non-susceptible to all carbapenem antibiotics  
186 tested. The remaining three isolates had OmpK35 mutations only and were susceptible to the  
187 carbapenems. In the final panel, only 4 isolates carried an acquired AmpC  $\beta$ -lactamase (*bla*<sub>FOX-5</sub>,  
188 *bla*<sub>DHA-1</sub>, or *bla*<sub>CMY-4</sub>) and all lacked OmpK mutations. Notably, 7 isolates had a truncated *mgrB*,  
189 known to mediate colistin resistance (**Table S1**), and five were resistant (MIC > 4) to colistin by  
190 broth microdilution (BMD). As the Clinical and Laboratory Standards Institute (CLSI)  
191 guidelines (34) do not recognize susceptible breakpoints for colistin the remaining two isolates  
192 with a truncated *mgrB* (791403 and 375436) were assigned intermediate interpretation (MIC  $\leq$   
193 0.25 and 1, respectively), as reported previously (12).

194 Forty-two isolates were susceptible to all three aminoglycosides tested (amikacin, gentamicin,  
195 and tobramycin) while 9 isolates were pan resistant to all aminoglycosides. All pan resistant  
196 isolates carried a 16S rRNA methyltransferase, with the exception of MRSN 430405 for which no  
197 acquired methyltransferase gene was identified (**Table S1**). Specifically, five of the pan resistant  
198 isolates (5881, 366562, 365679, 517281, and 613682) carried methyltransferase genes *rmtH*,  
199 *rmtF1*, or *rmtB1* and the remaining three (MRSN 27778, 607210, 368001) carried *armA*. MRSN

200 752729 also carried *armA* but was susceptible to amikacin and gentamicin. Reduced  
201 susceptibility was confirmed by BMD (amikacin, MIC=16; gentamicin, MIC=1). Further  
202 analysis of the *armA* sequence revealed a missense mutation at nucleotide position 617 (A to T)  
203 resulting in an amino acid substitution of isoleucine to lysine.

## 204 **Discussion**

205 In 2017, the WHO identified ESBL and carbapenemase-resistant Enterobacteriaceae as a  
206 “Critical” threat to human health. Similarly, the U.S. CDC named carbapenem-resistant and  
207 ESBL-producing Enterobacterales as “urgent” and “serious” threats, respectively (35). As a  
208 result, there has been a renewed and concerted effort to develop novel therapeutics and  
209 diagnostics to combat these organisms. This has been reflected at the highest level of the U.S.  
210 Government with the publication of the Presidential U.S. National Action Plan for Combating  
211 Antibiotic-Resistant Bacteria (CARB) (36). This document outlined strategies to combat this  
212 threat, including access to diverse isolates for testing. In response to these demands, the U.S.  
213 Department of Defense, through the MRSN, has published distinct panels (with corresponding  
214 metadata and genomes) for the ESKAPE pathogens *Acinetobacter baumannii* (24) and  
215 *Pseudomonas aeruginosa* (25). Herein we expand these panels by constructing a novel panel of  
216 *K. pneumoniae* isolates that, to our knowledge, is the only comprehensive panel publicly  
217 available for research and development. The panel was designed to encompass the maximum  
218 genetic diversity of the species, ensuring a diverse range of antibiotic susceptibilities, AMR  
219 genes and virulence genes.

220 Other panels and characterized *K. pneumoniae* strains exist, however, they mainly focus on the  
221 identification of antibiotic resistant mechanisms and were not designed to encompass the  
222 diversity of the species. For example, the U.S. CDC and FDA have collaborated to produce the  
223 AR Isolate Bank that contains multiple isolate panels for a range of bacterial pathogens and  
224 resistance mechanisms (<https://wwwn.cdc.gov/arisolatebank/Overview>) and this panel has  
225 proven to be an excellent resource to test the activity of antibiotic combinations (37). However,  
226 in addition to testing antibiotics, strain diversity is critical for assessing the efficacy of many

227 emerging therapeutics including phage therapy, vaccines, and capsule polysaccharides targeted  
228 approaches (38–40). The main structural receptor for anti-*Klebsiella* phages is the external  
229 capsular polysaccharide however recent work suggests that phages also attach to other outer  
230 membrane structures below the capsule, including the O-antigen (41, 42). The panel described  
231 herein represents 54 of the 77 distinct capsule types identified by serological methods (43) and 8  
232 predicted O serotypes (27, 44), providing a robust representation of outer membrane protein  
233 diversity to test anti-*Klebsiella* phages. Besides therapeutics, the understanding of *K.*  
234 *pneumoniae* pathogenesis is rapidly evolving, in particular the understanding of virulence factors  
235 that can accurately predict pathogenic potential of strains. For example, not all hvKp strains are  
236 equally virulent in murine models of infection despite carrying well-characterized virulence  
237 biomarkers (45). Herein we describe hvKp and convergent strains with diverse biomarkers to aid  
238 in these ongoing research efforts.

239 The epidemiology of *K. pneumoniae* over the past two decades has been characterized by widely  
240 geographically distributed “high risk” clones and the constant emergence and dissemination of  
241 new clonal groups (6). This panel not only captures the most important MDR-cKp (ST-258, ST-  
242 15, ST-11, ST-307, ST-147) and hvKp clones (ST-23, ST-380, ST-65, ST-86) currently  
243 circulating, but also encompasses the overall diversity of the species, an approach that  
244 maximizes the potential of the panel to include emerging strains, or those that may emerge in the  
245 future. To this end, the panel includes 6 novel lineages, including an XDR ST-5445 lineage  
246 carrying *bla*<sub>CTX-M-15</sub>, and 5 genomic convergent lineages that have not been previously described  
247 (ST-268, ST-1399, ST-48, ST-2071, ST-37). Furthermore, close attention was paid to selecting  
248 rare clones that cause localized epidemics in different regions of the world. Clones ST-43, ST-  
249 268, ST-340, ST-392 are all represented in the panel and have been reported previously as

250 harboring NDM carbapenemases and circulating in hospitalized patients in Iran (46). Similarly, a  
251 ST-340 clone carrying a NDM carbapenemase was recovered from patients at a tertiary care  
252 hospital in South Korea (47) and infections with ST-231 and/or ST-395 clones have been  
253 identified in local hospitals in Oman (48) and South India (48, 49). A genomic surveillance study  
254 from 2013 to 2014 found ST-231, ST-340, ST-323 (carrying various ESBLs and carbapenemase  
255 genes) clones all linked to nosocomial transmission events from 4 hospitals in Melbourne  
256 Australia (50). In our panel collection the XDR clone ST-340 was collected in Asia in 2015  
257 while the MDR clones ST-323 and ST-231 were recovered from North America in 2016 and  
258 2018, respectively. Interestingly these localized epidemic clones have yet to globally disseminate  
259 despite being highly antibiotic resistant.

260 Notably, a strong association between antibiotic susceptibility and the presence of AMR genes  
261 and/or mutations was observed, with few exceptions. For example, isolates carrying *bla*<sub>SHV-27</sub>  
262 ESBL had a non-ESBL phenotype. However, this discrepancy is most likely due to a base-pair  
263 substitution (A to C) in the promoter region that was previously reported in SHV-27-producing  
264 isolates susceptible to cephalosporins (51). Similarly, isolate MRSN 752729 carrying a missense  
265 mutation in *armA* 16s rRNA methyltransferase had increased susceptibility to all aminoglycoside  
266 antibiotics. Previous studies report that point mutations in *armA* can result in the inability to bind  
267 to the 16S rRNA and consequently block methylation resulting in susceptibility to  
268 aminoglycosides (52). Lastly, in this study the single GES-5-producing isolate (MRSN 28183)  
269 conferred non-susceptibility to ceftazidime, ceftriaxone, and ceftolozane-tazobactam but was  
270 susceptible to cefepime and carbapenem antibiotics. The GES-5 variant has a single amino acid  
271 substitution (G170S) compared to wild-type GES-1 and has been shown to confer activity  
272 against carbapenem antibiotics (53), yet, studies have also shown GES-5 producing *K.*

273 *pneumoniae* to have minimal to no carbapenemase activity (54, 55), consistent with our  
274 observations.

275 In summary, this study describes the construction of a panel of 100 unique *K. pneumoniae*  
276 isolates from an extensive collection of over 3,800 *K. pneumoniae* isolates collected from across  
277 the globe. The panel encompasses the diversity of the species, includes both antibiotic  
278 susceptible and non-susceptible isolates, and captures known epidemic clones as well as sporadic  
279 ones. Furthermore, this panel captures diverse genomic convergent and hvKp strains that are  
280 rapidly emerging worldwide and are of considerable concern (15, 45). While identifying these  
281 convergent lineages does not accurately predict clinical outcomes, availability of these  
282 characterized isolates (including phylogeny, genome, and AST) will aid in the research and  
283 development of infection-control measures to improve patient care. This panel and all metadata  
284 and genomes are publicly available at no additional charge and represent an invaluable resource  
285 for genotypic and phenotypic research of this important pathogen.

286 **Materials and Methods**

287 ***K. pneumoniae* repository.** The MRSN collects and analyzes MDR organisms across the  
288 Military Healthcare System in the United States (23) and around the world in collaboration with  
289 the US Department of Defense's (DoD) Global Emerging Infections Surveillance (GEIS) branch.  
290 All samples are housed in a central repository, which currently contains over 100,000 isolates,  
291 including 3,878 *K. pneumoniae* that were cultured from 2,760 patients between 2001 and 2020.

292 **Refinement of *K. pneumoniae* repository.** To reduce redundancy in the initial 3,878 isolate set,  
293 successive isolates after the first from the same patient that shared the same ST were removed  
294 unless isolates were cultured from a different body site (e.g. urine vs blood) or were cultured >6  
295 months apart. All isolates from the same patient with different STs were retained. This  
296 refinement resulted in a final dataset of 3,123 isolates available for analysis.

297 **Antibiotic susceptibility testing.** AST was performed in the MRSN's College of American  
298 Pathologists (CAP)-accredited laboratory using the Vitek 2 with the AST-95 and AST-XN09  
299 cards (bioMerieux, NC, US). Nineteen antibiotics representing 11 different antibiotic families  
300 were tested and interpreted using Clinical and Laboratory Standards Institute (CLSI) guidelines  
301 (CLSI 2018). Susceptibility results were used to classify the isolates as pan drug resistant (PDR)  
302 (non-susceptible to all antibiotics tested), extensively drug resistant (XDR) (non-susceptible to  
303  $\geq 1$  agent in all but  $\leq 2$  families), MDR (non-susceptible to  $\geq 1$  agent in  $\geq 3$  antibiotic families), and  
304 non-MDR (non-susceptible to 1 or 2 categories) using a modification of the criteria defined by  
305 Magiorakos et al (30). When necessary, MICs were repeated in triplicate using broth  
306 microdilution and CLSI guidelines (CLSI 2018).

307 **Whole-genome sequencing and data analysis.** Briefly, isolates were sequenced on an Illumina  
308 MiSeq or NextSeq benchtop sequencer (Illumina, Inc., CA, US) and analyzed as previously



309 described (24). Where appropriate, long read sequencing was performed with the Oxford  
310 nanopore MinION sequencer (Oxford Nanopore Technologies), as previously described (12). *In*  
311 *silico* MLST typing, virulence loci, polysaccharide capsule (K) loci, and lipopolysaccharide (O)  
312 loci typing were performed using Kleborate v2.0.1 (56). Novel MLST STs were determined  
313 using the Klebsiella PasteurMLST sequence database (<https://bigsd.b.pasteur.fr/klebsiella>).  
314 AMRFinderPlus v3.9.8 (57) and ARIBA v2.14.4 (58) were used to identify resistance alleles.  
315 Basic assembly statistics are available (see **Table S2** in the supplemental material).

316 **cgMLST analysis.** The draft genomes of all 3,878 *K. pneumoniae* isolates were uploaded and  
317 analyzed using Ridom SeqSphere+ (59) using the *K. pneumoniae* cgMLST scheme  
318 (<https://www.cgmlst.org/ncs>). To be included in the analysis, isolates had to contain 90% of the  
319 2,358 genes included in the cgMLST scheme. The resulting minimum spanning tree (MST) was  
320 then used to select 346 strains that capture the diversity of the strain collection.

321 **Core-genome SNP analysis.** PanSeq (60) was run with a fragmentation size of 500 bp to find  
322 sequences with  $\geq 95\%$  identity in  $\geq 95\%$  of the isolates to generate the core genome single  
323 nucleotide polymorphism (SNP) alignment for the initial set of 346 isolates. RAxML (v8.2.11)  
324 (61) was used to generate a phylogenetic tree for the core SNP alignment. The SNP-based  
325 phylogeny was built from a 317-kb variable position alignment using the general time reversible  
326 (GTR) GAMMA model and the rapid bootstrapping option for nucleotide sequences, using 100  
327 replicates. Using this approach, 100 strains were selected to represent the final diversity panel.  
328 For the final diversity set of 100 isolates, reads were checked for contamination at the species  
329 level with Kraken2 (v2.0.8-beta) (62) and at the strain level using ConFindr (v0.4.8) (63) with  
330 parameters  $bf=0.05$  and  $q=30$ , as previously described (24). A phylogenetic tree of the 100  
331 isolates was constructed with PanSeq and RAxML as described above. The SNP-based

332 phylogeny was built from 169-kb variable position alignment. For all 100 isolates included in the  
333 panel, genome annotations were performed using NCBI Prokaryotic Genome Annotation  
334 Pipeline (v4.8) and core and pangenomes were calculated with Roary (v3.12.0) (64). The final  
335 100 genomes have been deposited in the National Center for Biotechnology Information under  
336 BioProject PRJNA717739.

337 **Diversity panel availability.** The final *K. pneumoniae* diversity panel has been deposited at BEI  
338 resources (<https://www.beiresources.org/>) and is currently available for research purposes under  
339 catalogue #NR-55604.

340 **Acknowledgements**

341 This study was funded by the U.S. Army Medical command, the Defense Medical Research and  
342 Development Program and the Department of Defense (DoD) Global Emerging Infections  
343 Surveillance (GEIS) program (Award P0140\_20\_WR\_04 to J.W. Bennett and P.T. McGann).

344 We gratefully acknowledge the participation of clinical laboratories across the Military  
345 Healthcare System, GEIS-affiliated overseas laboratories, and numerous collaborators for their  
346 contributions of bacteria to the MRSN repository.

347 The manuscript has been reviewed by the Walter Reed Army Institute of Research and there is  
348 no objection to its presentation. The opinions or assertions contained herein are the private views  
349 of the authors and are not to be construed as official or reflecting the views of the Department of  
350 the Army or the Department of Defense.

## 351 References

- 352 1. Podschun R, Ullmann U. 1998. *Klebsiella* spp. as Nosocomial Pathogens: Epidemiology,  
353 Taxonomy, Typing Methods, and Pathogenicity Factors. Clin Microbiol Rev 11:589–603.
- 354 2. Boucher HW, Talbot GH, Bradley JS, Edwards JE, Gilbert D, Rice LB, Scheld M,  
355 Spellberg B, Bartlett J. 2009. Bad Bugs, No Drugs: No ESKAPE! An Update from the  
356 Infectious Diseases Society of America. Clin Infect Dis 48:1–12.
- 357 3. Cassini A, Högberg LD, Plachouras D, Quattrocchi A, Hoxha A, Simonsen GS, Colomb-  
358 Cotinat M, Kretzschmar ME, Devleeschauwer B, Cecchini M, Ouakrim DA, Oliveira TC,  
359 Struelens MJ, Suetens C, Monnet DL, Strauss R, Mertens K, Struyf T, Catry B, Latour K,  
360 Ivanov IN, Dobрева EG, Tambic Andrašević A, Soprek S, Budimir A, Paphitou N,  
361 Žemlicková H, Schytte Olsen S, Wolff Sönksen U, Märtin P, Ivanova M, Lyytikäinen O,  
362 Jalava J, Coignard B, Eckmanns T, Abu Sin M, Haller S, Daikos GL, Gikas A, Tsiodras S,  
363 Kontopidou F, Tóth Á, Hajdu Á, Guólaugsson Ó, Kristinsson KG, Murchan S, Burns K,  
364 Pezzotti P, Gagliotti C, Dumpis U, Liuimiene A, Perrin M, Borg MA, de Greeff SC, Monen  
365 JC, Koek MB, Elstrøm P, Zabicka D, Deptula A, Hryniewicz W, Caniça M, Nogueira PJ,  
366 Fernandes PA, Manageiro V, Popescu GA, Serban RI, Schréterová E, Litvová S,  
367 Štefkovicová M, Kolman J, Klavs I, Korošec A, Aracil B, Asensio A, Pérez-Vázquez M,  
368 Billström H, Larsson S, Reilly JS, Johnson A, Hopkins S. 2019. Attributable deaths and  
369 disability-adjusted life-years caused by infections with antibiotic-resistant bacteria in the  
370 EU and the European Economic Area in 2015: a population-level modelling analysis.  
371 Lancet Infect Dis 19:56–66.
- 372 4. Murray CJ, Ikuta KS, Sharara F, Swetschinski L, Robles Aguilar G, Gray A, Han C,  
373 Bisignano C, Rao P, Wool E, Johnson SC, Browne AJ, Chipeta MG, Fell F, Hackett S,  
374 Haines-Woodhouse G, Kashef Hamadani BH, Kumaran EAP, McManigal B, Agarwal R,  
375 Akech S, Albertson S, Amuasi J, Andrews J, Aravkin A, Ashley E, Bailey F, Baker S,  
376 Basnyat B, Bekker A, Bender R, Bethou A, Bielicki J, Boonkasidecha S, Bukosia J,  
377 Carvalheiro C, Castañeda-Orjuela C, Chansamouth V, Chaurasia S, Chiurchiù S,  
378 Chowdhury F, Cook AJ, Cooper B, Cressey TR, Criollo-Mora E, Cunningham M, Darboe  
379 S, Day NPJ, De Luca M, Dokova K, Dramowski A, Dunachie SJ, Eckmanns T, Eibach D,  
380 Emami A, Feasey N, Fisher-Pearson N, Forrest K, Garrett D, Gastmeier P, Giref AZ, Greer  
381 RC, Gupta V, Haller S, Haselbeck A, Hay SI, Holm M, Hopkins S, Iregbu KC, Jacobs J,  
382 Jarovsky D, Javanmardi F, Khorana M, Kissoon N, Kobeissi E, Kostyanov T, Krapp F,  
383 Krumkamp R, Kumar A, Kyu HH, Lim C, Limmathurotsakul D, Loftus MJ, Lunn M, Ma J,  
384 Mturi N, Munera-Huertas T, Musicha P, Mussi-Pinhata MM, Nakamura T, Nanavati R,  
385 Nangia S, Newton P, Ngoun C, Novotney A, Nwakanma D, Obiero CW, Olivas-Martinez  
386 A, Olliaro P, Ooko E, Ortiz-Brizuela E, Peleg AY, Perrone C, Plakkal N, Ponce-de-Leon A,  
387 Raad M, Ramdin T, Riddell A, Roberts T, Robotham JV, Roca A, Rudd KE, Russell N,  
388 Schnall J, Scott JAG, Shivamallappa M, Sifuentes-Osornio J, Steenkeste N, Stewardson AJ,  
389 Stoeva T, Tasak N, Thaiprakong A, Thwaites G, Turner C, Turner P, van Doorn HR,  
390 Velaphi S, Vongpradith A, Vu H, Walsh T, Waner S, Wangrangsimaikul T, Wozniak T,  
391 Zheng P, Sartorius B, Lopez AD, Stergachis A, Moore C, Dolecek C, Naghavi M. 2022.  
392 Global burden of bacterial antimicrobial resistance in 2019: a systematic analysis. The  
393 Lancet 399:629–655.

- 394 5. Navon-Venezia S, Kondratyeva K, Carattoli A. 2017. *Klebsiella pneumoniae*: a major  
395 worldwide source and shuttle for antibiotic resistance. FEMS Microbiol Rev 41:252–275.
- 396 6. Wyres KL, Lam MMC, Holt KE. 2020. Population genomics of *Klebsiella pneumoniae*.  
397 Nat Rev Microbiol 18:344–359.
- 398 7. Chen L, Todd R, Kiehlbauch J, Walters M, Kallen A. 2017. Pan-Resistant New Delhi  
399 Metallo-Beta-Lactamase-Producing *Klebsiella pneumoniae* - Washoe County, Nevada,  
400 2016. Morb Mortal Wkly Rep 66.
- 401 8. World Health Organization. 2017. Prioritization of pathogens to guide resistant bacterial  
402 infections, including tuberculosis. World Health Organization, Geneva, Switzerland.
- 403 9. Shon AS, Bajwa RPS, Russo TA. 2013. Hypervirulent (hypermucoviscous) *Klebsiella*  
404 *pneumoniae*: A new and dangerous breed. Virulence 4:107–118.
- 405 10. Lam MMC, Wyres KL, Duchêne S, Wick RR, Judd LM, Gan Y-H, Hoh C-H, Archuleta S,  
406 Molton JS, Kalimuddin S, Koh TH, Passet V, Brisse S, Holt KE. 2018. Population  
407 genomics of hypervirulent *Klebsiella pneumoniae* clonal-group 23 reveals early emergence  
408 and rapid global dissemination. Nat Commun 9:2703.
- 409 11. Nassif X, Sansonetti PJ. 1986. Correlation of the virulence of *Klebsiella pneumoniae* K1  
410 and K2 with the presence of a plasmid encoding aerobactin. Infect Immun 54:603–608.
- 411 12. Martin MJ, Corey BW, Sannio F, Hall LR, MacDonald U, Jones BT, Mills EG, Harless C,  
412 Stam J, Maybank R, Kwak Y, Schaufler K, Becker K, Hübner N-O, Cresti S, Tordini G,  
413 Valassina M, Cusi MG, Bennett JW, Russo TA, McGann PT, Lebreton F, Docquier J-D.  
414 2021. Anatomy of an extensively drug-resistant *Klebsiella pneumoniae* outbreak in  
415 Tuscany, Italy. Proc Natl Acad Sci 118:e2110227118.
- 416 13. Gu D, Dong N, Zheng Z, Lin D, Huang M, Wang L, Chan EW-C, Shu L, Yu J, Zhang R,  
417 Chen S. 2018. A fatal outbreak of ST11 carbapenem-resistant hypervirulent *Klebsiella*  
418 *pneumoniae* in a Chinese hospital: a molecular epidemiological study. Lancet Infect Dis  
419 18:37–46.
- 420 14. Wyres KL, Nguyen TNT, Lam MMC, Judd LM, van Vinh Chau N, Dance DAB, Ip M,  
421 Karkey A, Ling CL, Miliya T, Newton PN, Lan NPH, Sengduangphachanh A, Turner P,  
422 Veeraraghavan B, Vinh PV, Vongsouvath M, Thomson NR, Baker S, Holt KE. 2020.  
423 Genomic surveillance for hypervirulence and multi-drug resistance in invasive *Klebsiella*  
424 *pneumoniae* from South and Southeast Asia. Genome Med 12:11.
- 425 15. Gonzalez-Ferrer S, Peñaloza HF, Budnick JA, Bain WG, Nordstrom HR, Lee JS, Van Tyne  
426 D. 2021. Finding Order in the Chaos: Outstanding Questions in *Klebsiella pneumoniae*  
427 Pathogenesis. Infect Immun 89:e00693-20.
- 428 16. Holt KE, Wertheim H, Zadoks RN, Baker S, Whitehouse CA, Dance D, Jenney A, Connor  
429 TR, Hsu LY, Severin J, Brisse S, Cao H, Wilksch J, Gorrie C, Schultz MB, Edwards DJ,  
430 Nguyen KV, Nguyen TV, Dao TT, Mensink M, Minh VL, Nhu NTK, Schultsz C,

- 431 Kuntaman K, Newton PN, Moore CE, Strugnell RA, Thomson NR. 2015. Genomic analysis  
432 of diversity, population structure, virulence, and antimicrobial resistance in *Klebsiella*  
433 *pneumoniae*, an urgent threat to public health. *Proc Natl Acad Sci* 112:E3574–E3581.
- 434 17. the EuSCAPE Working Group, the ESGEM Study Group, David S, Reuter S, Harris SR,  
435 Glasner C, Feltwell T, Argimon S, Abudahab K, Goater R, Giani T, Errico G, Aspbury M,  
436 Sjunnebo S, Feil EJ, Rossolini GM, Aanensen DM, Grundmann H. 2019. Epidemic of  
437 carbapenem-resistant *Klebsiella pneumoniae* in Europe is driven by nosocomial spread. *Nat*  
438 *Microbiol* 4:1919–1929.
- 439 18. Marsh JW, Mustapha MM, Griffith MP, Evans DR, Ezeonwuka C, Pasculle AW, Shutt KA,  
440 Sundermann A, Ayres AM, Shields RK, Babiker A, Cooper VS, Van Tyne D, Harrison LH.  
441 2019. Evolution of Outbreak-Causing Carbapenem-Resistant *Klebsiella pneumoniae* ST258  
442 at a Tertiary Care Hospital over 8 Years. *mBio* 10:e01945-19.
- 443 19. Shropshire WC, Dinh AQ, Earley M, Komarow L, Panesso D, Rydell K, Gómez-Villegas  
444 SI, Miao H, Hill C, Chen L, Patel R, Fries BC, Abbo L, Cober E, Revolinski S, Luterbach  
445 CL, Chambers H, Fowler VG, Bonomo RA, Shelburne SA, Kreiswirth BN, van Duin D,  
446 Hanson BM, Arias CA. 2022. Accessory Genomes Drive Independent Spread of  
447 Carbapenem-Resistant *Klebsiella pneumoniae* Clonal Groups 258 and 307 in Houston, TX.  
448 *mBio* 13:e00497-22.
- 449 20. Heiden SE, Hübner N-O, Bohnert JA, Heidecke C-D, Kramer A, Balau V, Gierer W,  
450 Schaefer S, Eckmanns T, Gatermann S, Eger E, Guenther S, Becker K, Schaufler K. 2020.  
451 A *Klebsiella pneumoniae* ST307 outbreak clone from Germany demonstrates features of  
452 extensive drug resistance, hypermucoviscosity, and enhanced iron acquisition. *Genome*  
453 *Med* 12:113.
- 454 21. Falcone M, Giordano C, Barnini S, Tiseo G, Leonildi A, Malacarne P, Menichetti F,  
455 Carattoli A. 2020. Extremely drug-resistant NDM-9-producing ST147 *Klebsiella*  
456 *pneumoniae* causing infections in Italy, May 2020. *Eurosurveillance* 25:6.
- 457 22. Wyres KL, Wick RR, Judd LM, Froumine R, Tokolyi A, Gorrie CL, Lam MMC, Duchêne  
458 S, Jenney A, Holt KE. 2019. Distinct evolutionary dynamics of horizontal gene transfer in  
459 drug resistant and virulent clones of *Klebsiella pneumoniae*. *PLOS Genet* 15:e1008114.
- 460 23. Waterman P, Kwak Y, Clifford R, Julius M, Onmus-Leone F, Tsurgeon C, Riley M, Black  
461 C, McGann P, Lesho E. 2012. A multidrug-resistance surveillance network: 1 year on.  
462 *Lancet Infect Dis* 12:587–588.
- 463 24. Galac MR, Snesrud E, Lebreton F, Stam J, Julius M, Ong AC, Maybank R, Jones AR,  
464 Kwak YI, Hinkle K, Waterman PE, Lesho EP, Bennett JW, Mc Gann P. 2020. A Diverse  
465 Panel of Clinical *Acinetobacter baumannii* for Research and Development. *Antimicrob*  
466 *Agents Chemother* 64:e00840-20.
- 467 25. Lebreton F, Snesrud E, Hall L, Mills E, Galac M, Stam J, Ong A, Maybank R, Kwak YI,  
468 Johnson S, Julius M, Ly M, Swierczewski B, Waterman PE, Hinkle M, Jones A, Lesho E,



- 469 Bennett JW, McGann P. 2021. A panel of diverse *Pseudomonas aeruginosa* clinical isolates  
470 for research and development. JAC-Antimicrob Resist 3:dlab179.
- 471 26. Diancourt L, Passet V, Verhoef J, Grimont PAD, Brisse S. 2005. Multilocus Sequence  
472 Typing of *Klebsiella pneumoniae* Nosocomial Isolates. J Clin Microbiol 43:4178–4182.
- 473 27. Lam MMC, Wick RR, Judd LM, Holt KE, Wyres KL. 2022. Kaptive 2.0: updated capsule  
474 and LPS locus typing for the *Klebsiella pneumoniae* species complex. Microbial Genomics  
475 8:000800.
- 476 28. Follador R, Heinz E, Wyres KL, Ellington MJ, Kowarik M, Holt KE, Thomson NR. 2016.  
477 The diversity of *Klebsiella pneumoniae* surface polysaccharides. Microb Genomics 2.
- 478 29. Lam MMC, Wick RR, Wyres KL, Gorrie CL, Judd LM, Jenney AWJ, Brisse S, Holt KE.  
479 2018. Genetic diversity, mobilisation and spread of the yersiniabactin-encoding mobile  
480 element ICEKp in *Klebsiella pneumoniae* populations. Microb Genomics 4.
- 481 30. Magiorakos A-P, Srinivasan A, Carey RB, Carmeli Y, Falagas ME, Giske CG, Harbarth S,  
482 Hindler JF, Kahlmeter G, Olsson-Liljequist B, Paterson DL, Rice LB, Stelling J, Struelens  
483 MJ, Vatopoulos A, Weber JT, Monnet DL. 2012. Multidrug-resistant, extensively drug-  
484 resistant and pandrug-resistant bacteria: an international expert proposal for interim  
485 standard definitions for acquired resistance. Clin Microbiol Infect 18:268–281.
- 486 31. Corkill JE, Cuevas LE, Gurgel RQ, Greensill J, Hart CA. SHV-27, a novel cefotaxime-  
487 hydrolysing  $\beta$ -lactamase, identified in *Klebsiella pneumoniae* isolates from a Brazilian  
488 hospital. Journal of Antimicrobial Chemotherapy 47:463-465.
- 489 32. Wise MG, Horvath E, Young K, Sahm DF, Kazmierczak KM. 2018. Global survey of  
490 *Klebsiella pneumoniae* major porins from ertapenem non-susceptible isolates lacking  
491 carbapenemases. J Med Microbiol 67:289–295.
- 492 33. Jacoby GA. 2009. AmpC  $\beta$ -Lactamases. Clin Microbiol Rev 22:161–182.
- 493 34. Clinical and Laboratory Standards Institute. 2018. Method for Dilution Antimicrobial  
494 Susceptibility Tests for Bacteria That Grow Aerobically. Clin Lab Stand Inst 11th.
- 495 35. Centers for Disease Control and Prevention (U.S.). 2019. Antibiotic resistance threats in the  
496 United States, 2019. Centers for Disease Control and Prevention (U.S.).
- 497 36. The White House. 2015. National Action Plan For Combating Antibiotic-Resistant  
498 Bacteria. The White House, Washington, DC.
- 499 37. Brennan-Krohn T, Kirby JE. 2019. Synergistic Combinations and Repurposed Antibiotics  
500 Active against the Pandrug-Resistant *Klebsiella pneumoniae* Nevada Strain. Antimicrob  
501 Agents Chemother 63:e01374-19.

- 502 38. Opoku-Temeng C, Kobayashi SD, DeLeo FR. 2019. *Klebsiella pneumoniae* capsule  
503 polysaccharide as a target for therapeutics and vaccines. *Comput Struct Biotechnol J*  
504 17:1360–1366.
- 505 39. Laforêt F, Antoine C, Blasdel Reuter B, Detilleux J, Pirnay J-P, Brisse S, Fall A, Duprez J-  
506 N, Delcenserie V, Thiry D. 2022. In Vitro and In Vivo Assessments of Two Newly Isolated  
507 Bacteriophages against an ST13 Urinary Tract Infection *Klebsiella pneumoniae*. *Viruses*  
508 14:1079.
- 509 40. Pathogen genomics leading to vaccines. 2019. *Nat Genet* 51:923–923.
- 510 41. Lourenço M, Osbelt L, Passet V, Gravey F, Strowig T, Rodrigues C, Brisse S. 2022. Phages  
511 against non-capsulated *Klebsiella pneumoniae*: broader host range, slower resistance.  
512 preprint. *Microbiology*.
- 513 42. Hesse S, Rajaure M, Wall E, Johnson J, Bliskovsky V, Gottesman S, Adhya S. 2020. Phage  
514 Resistance in Multidrug-Resistant *Klebsiella pneumoniae* ST258 Evolves via Diverse  
515 Mutations That Culminate in Impaired Adsorption. *mBio* 11:e02530-19.
- 516 43. Orskov, I. D. A. & Fife-Asbury, M.A. 1977. New *Klebsiella* Capsular Antigen, K82, and  
517 the Deletion of Five of Those Previously Assigned. *Int. J. Syst, Bacteriol.* 27:386-387.
- 518 44. Clarke BR, Ovchinnikova OG, Kelly SD, Williamson ML, Butler JE, Liu B, Wang L, Gou  
519 X, Follador R, Lowary TL, Whitfield C. 2018. Molecular basis for the structural diversity  
520 in serogroup O2-antigen polysaccharides in *Klebsiella pneumoniae*. *J Biol Chem*  
521 293:4666–4679.
- 522 45. Russo TA, MacDonald U, Hassan S, Camanzo E, LeBreton F, Corey B, McGann P. 2021.  
523 An Assessment of Siderophore Production, Mucoviscosity, and Mouse Infection Models for  
524 Defining the Virulence Spectrum of Hypervirulent *Klebsiella pneumoniae*. *mSphere*  
525 6:e00045-21.
- 526 46. Kiaei S, Moradi M, hosseini-nave H, Ziasistani M, Kalantar-Neyestanaki D. 2018. Endemic  
527 dissemination of different sequence types of carbapenem-resistant *Klebsiella pneumoniae*  
528 strains harboring *bla<sub>NDM</sub>* and 16S rRNA methylase genes in Kerman hospitals, Iran, from  
529 2015 to 2017. *Infect Drug Resist* Volume 12:45–54.
- 530 47. Kim M-N, Yong D, An D, Chung H-S, Woo JH, Lee K, Chong Y. 2012. Nosocomial  
531 Clustering of NDM-1-Producing *Klebsiella pneumoniae* Sequence Type 340 Strains in Four  
532 Patients at a South Korean Tertiary Care Hospital. *J Clin Microbiol* 50:1433–1436.
- 533 48. AL-Quraini M, Rizvi M, AL-Jabri Z, Sami H, AL-Muzahmi M, AL-Muharmi Z, Taneja N,  
534 AL-Busaidi I, Soman R. 2022. Assessment of In-Vitro Synergy of Fosfomycin with  
535 Meropenem, Amikacin and Tigecycline in Whole Genome Sequenced Extended and Pan  
536 Drug Resistant *Klebsiella Pneumoniae*: Exploring A Colistin Sparing Protocol. *Antibiotics*  
537 11:153.



- 538 49. Pragasam AK, Shankar C, Veeraraghavan B, Biswas I, Nabarro LEB, Inbanathan FY,  
539 George B, Verghese S. 2017. Molecular Mechanisms of Colistin Resistance in *Klebsiella*  
540 *pneumoniae* Causing Bacteremia from India—A First Report. *Front Microbiol* 7:2135.
- 541 50. Gorrie CL, Mirčeta M, Wick RR, Judd LM, Lam MMC, Gomi R, Abbott IJ, Thomson NR,  
542 Strugnell RA, Pratt NF, Garlick JS, Watson KM, Hunter PC, Pilcher DV, McGloughlin SA,  
543 Spelman DW, Wyres KL, Jenney AWJ, Holt KE. 2022. Genomic dissection of *Klebsiella*  
544 *pneumoniae* infections in hospital patients reveals insights into an opportunistic pathogen.  
545 *Nat Commun* 13:3017.
- 546 51. Klaper K, Hammerl JA, Rau J, Pfeifer Y, Werner G. 2021. Genome-Based Analysis of  
547 *Klebsiella* spp. Isolates from Animals and Food Products in Germany, 2013–2017.  
548 *Pathogens* 10:573.
- 549 52. Liroy VS, Goussard S, Guerineau V, Yoon E-J, Courvalin P, Galimand M, Grillot-Courvalin  
550 C. 2014. Aminoglycoside resistance 16S rRNA methyltransferases block endogenous  
551 methylation, affect translation efficiency and fitness of the host. *RNA* 20:382–391.
- 552 53. Bontron S, Poirel L, Nordmann P. 2015. *In Vitro* Prediction of the Evolution of GES-1  $\beta$ -  
553 Lactamase Hydrolytic Activity. *Antimicrob Agents Chemother* 59:1664–1670.
- 554 54. Jeong SH, Bae IK, Kim D, Hong SG, Song JS, Lee JH, Lee SH. 2005. First Outbreak of  
555 *Klebsiella pneumoniae* Clinical Isolates Producing GES-5 and SHV-12 Extended-Spectrum  
556 B-Lactamases in Korea. *Antimicrob Agents Chemother* 49:4809–4810.
- 557 55. Chen D-Q, Wu A-W, Yang L, Su D-H, Lin Y, Hu Y-W, Zheng L, Wang Q. 2016.  
558 Emergence and Plasmid Analysis of *Klebsiella pneumoniae* KP01 Carrying *bla*<sub>GES-5</sub> from  
559 Guangzhou, China. *Antimicrob Agents Chemother* 60:6362–6364.
- 560 56. Lam MMC, Wick RR, Watts SC, Cerdeira LT, Wyres KL, Holt KE. 2021. A genomic  
561 surveillance framework and genotyping tool for *Klebsiella pneumoniae* and its related  
562 species complex. *Nat Commun* 12:4188.
- 563 57. Feldgarden M, Brover V, Haft DH, Prasad AB, Slotta DJ, Tolstoy I, Tyson GH, Zhao S,  
564 Hsu C-H, McDermott PF, Tadesse DA, Morales C, Simmons M, Tillman G, Wasilenko J,  
565 Folster JP, Klimke W. 2019. Validating the AMRFinder Tool and Resistance Gene  
566 Database by Using Antimicrobial Resistance Genotype-Phenotype Correlations in a  
567 Collection of Isolates. *Antimicrob Agents Chemother* 63:e00483-19.
- 568 58. Hunt M, Mather AE, Sánchez-Busó L, Page AJ, Parkhill J, Keane JA, Harris SR. 2017.  
569 ARIBA: rapid antimicrobial resistance genotyping directly from sequencing reads. *Microb*  
570 *Genomics* 3.
- 571 59. Jünemann S, Sedlazeck FJ, Prior K, Albersmeier A, John U, Kalinowski J, Mellmann A,  
572 Goesmann A, von Haeseler A, Stoye J, Harmsen D. 2013. Updating benchtop sequencing  
573 performance comparison. *Nat Biotechnol* 31:294–296.

- 574 60. Laing C, Buchanan C, Taboada EN, Zhang Y, Kropinski A, Villegas A, Thomas JE,  
575 Gannon VP. 2010. Pan-genome sequence analysis using Panseq: an online tool for the rapid  
576 analysis of core and accessory genomic regions. *BMC Bioinformatics* 11:461.
- 577 61. Stamatakis A. 2014. RAxML version 8: a tool for phylogenetic analysis and post-analysis  
578 of large phylogenies. *Bioinformatics* 30:1312–1313.
- 579 62. Wood DE, Lu J, Langmead B. 2019. Improved metagenomic analysis with Kraken 2.  
580 *Genome Biol* 20:257.
- 581 63. Low AJ, Koziol AG, Manninger PA, Blais B, Carrillo CD. 2019. ConFindr: rapid detection  
582 of intraspecies and cross-species contamination in bacterial whole-genome sequence data.  
583 *PeerJ* 7:e6995.
- 584 64. Page AJ, Cummins CA, Hunt M, Wong VK, Reuter S, Holden MTG, Fookes M, Falush D,  
585 Keane JA, Parkhill J. 2015. Roary: rapid large-scale prokaryote pan genome analysis.  
586 *Bioinformatics* 31:3691–3693.

587

588

589

590

591

A

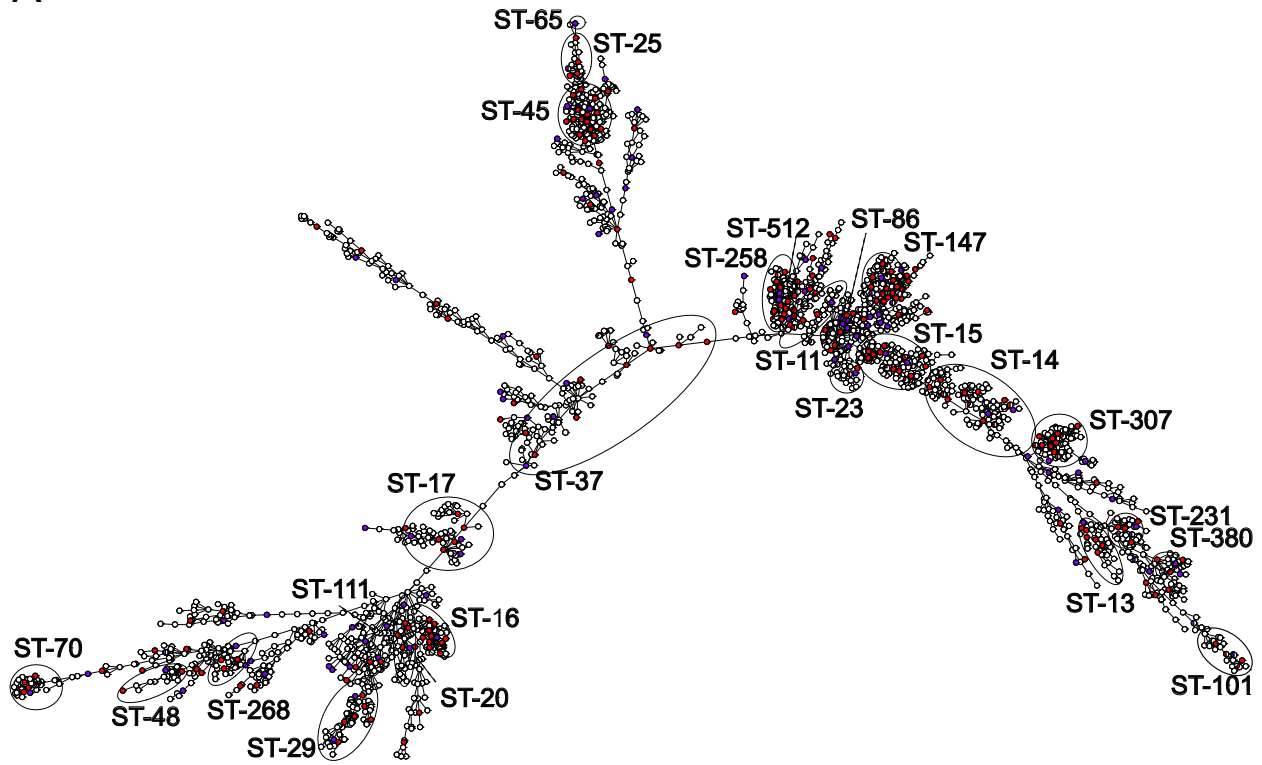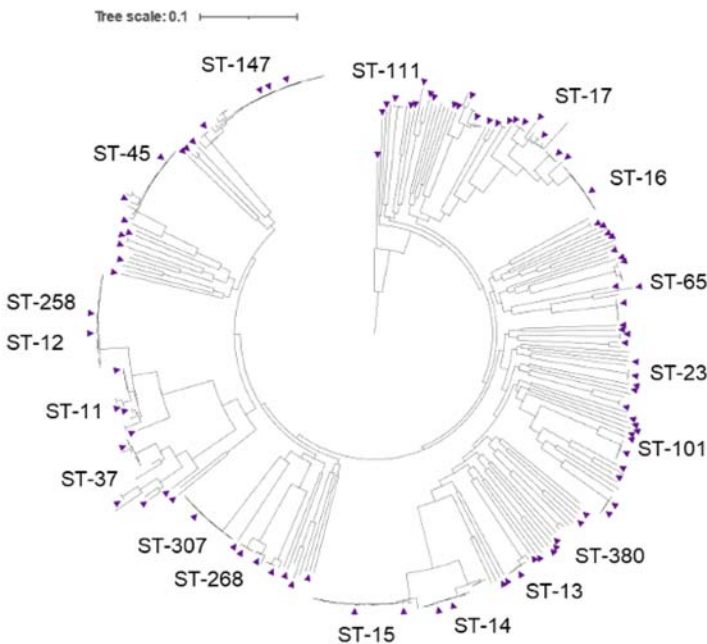

C

|                  |   | virulence score |   |   |   |   |   |
|------------------|---|-----------------|---|---|---|---|---|
|                  |   | 0               | 1 | 2 | 3 | 4 | 5 |
| resistance score | 0 | 27              | 5 | 2 | 1 | 0 | 1 |
|                  | 1 | 28              | 5 | 1 | 2 | 1 | 1 |
|                  | 2 | 8               | 7 | 1 | 1 | 1 | 0 |
|                  | 3 | 3               | 4 | 1 | 0 | 0 | 0 |

| Isolate | ST   | Genes                                            |
|---------|------|--------------------------------------------------|
| 582610  | 268  | <i>ybt, clb, iuc, iro, mmpA, mmpA2, CTX-M-15</i> |
| 515432  | 1399 | <i>ybt, iuc, mmpA2, CTX-M-15, SHV-12</i>         |
| 752729  | 147  | <i>ybt, iuc, mmpA, mmpA2, CTX-M-15, NDM-1</i>    |
| 5881    | 48   | <i>iuc, mmpA2, CTX-M-15</i>                      |
| 365679  | 2071 | <i>iuc, CTX-M-15, NDM-1</i>                      |
| 731029  | 37   | <i>iuc, CTX-M-14</i>                             |

Figure 1



## 592 **Figure Legends**

593 **Figure 1. Genomic diversity of *K. pneumoniae* in the MRSN collection** A) cgMLST  
594 minimum spanning tree of the 3,123 *K. pneumoniae* genomes. Isolates with an identical MLST  
595 profile are represented within a single circle. Initial subset of isolates selected are indicated by  
596 filled red circles ( $n = 346$ ) and the final panel isolates are indicated by filled purple circles ( $n =$   
597 100). B) Core genome SNP phylogenetic tree of 346 *K. pneumoniae* isolates initially selected to  
598 represent the breadth of *K. pneumoniae* diversity. The final 100 isolates selected for the panel are  
599 indicated in purple triangles. C) Heatmap indicating the combination of virulence/resistance  
600 scores for all panel isolates. *In silico* prediction using the Kleborate typing tool and visual  
601 inspired from Lam and coauthors (54). The number of isolates with a specific score are indicated  
602 in the boxes. Convergent isolates are indicated by the dashed black box and listed in the table  
603 below. All convergent isolates are carrying the *iuc* loci and an ESBL and/or carbapenemase gene.

604 **Figure 2. Characteristics of the *K. pneumoniae* diversity panel.** Core genome SNP-based  
605 phylogenetic tree of the 100 genomes in the final diversity panel. Sequence-type (ST), virulence  
606 score (see legend), capsule polysaccharide locus, KL-type, and AMR status (see legend and text  
607 for additional details) are indicated in the columns. The assigned antimicrobial resistance  
608 phenotype for each antibiotic tested is indicated by the maroon squares- a result of non-  
609 susceptible (filled) or susceptible (open). The light blue circles indicate the presence of a known  
610 antimicrobial resistance gene, and the orange circles indicate the presence of a known  
611 mutation/truncation. AMK, amikacin; GEN, gentamicin; TOB, tobramycin; ATM, aztreonam;  
612 SAM, ampicillin/sulbactam; CAZ, ceftazidime; CRO, ceftriaxone; FEP, cefepime; CZA,  
613 ceftazidime/avibactam; C/T ceftolozane/tazobactam; IPM, imipenem; MEM meropenem; CIP,

- 614 ciprofloxacin, LVX, levofloxacin; TZP, piperacillin/tazobactam; SXT, Sulfamethoxazole-
- 615 Trimethoprim; TET, Tetracycline; TGC, Tigecycline.
